# Supplementary material for: Circulating Biomarkers for the Prediction of Abdominal Aortic Aneurysm Growth
Source: MDPI journal article supplement (doi:10.3390/jcm10081718), 2021-04-16
Supplement: s1 [file s1]

## Supplementary Tables

**Table S1.** Patient-intervention-comparison-outcome (PICO) model.

|   |                                              |                                                                                                                                                                                                        |
|---|----------------------------------------------|--------------------------------------------------------------------------------------------------------------------------------------------------------------------------------------------------------|
| P | Patient, population or problem               | Patients with AAA under surveillance for alterations in AAA diameter                                                                                                                                   |
| I | Intervention, prognostic factor or exposure  | Serum biomarkers associated to AAA expansion rate                                                                                                                                                      |
| C | Comparison of intervention                   | Positive predictive role of serum biomarkers in AAA growth rate                                                                                                                                        |
| O | Outcome you would like to measure or achieve | Changes in AAA diameter during a surveillance timespan associated to alterations on biomarkers' levels                                                                                                 |
|   | What type of question are you asking?        | Are there clinically used serum biomarker that could predict aneurysm expansion rate in patients with AAA?                                                                                             |
|   |                                              | Are there clinically used serum biomarker that could predict aneurysm expansion rate in patients with AAA?                                                                                             |
|   | Type of study you want to find               | Observational prospective and retrospective cohort studies, randomised control trials, Case series, case-control studies reporting on the association of serum biomarkers in AAA growth rate in humans |

AAA: abdominal aortic aneurysm.

**Table S2.** Risk of Bias Assessment (ROBINS-I) for Observational Studies.

| Studies                | D1  | D2  | D3  | D4  | D5  | D6  | D7  | Overall |
|------------------------|-----|-----|-----|-----|-----|-----|-----|---------|
| Ceniga, et al [19]     | (+) | (-) | (-) | (-) | (-) | (+) | (-) | (+)     |
| Colledge, et al [20]   | (+) | (-) | (-) | (-) | (-) | (+) | (-) | (+)     |
| Ceniga, et al [21]     | (+) | (-) | (-) | (-) | (-) | (+) | (-) | (+)     |
| Burillo, et al [22]    | (+) | (-) | (-) | (-) | (-) | (+) | (-) | (+)     |
| Moxon, et al [23]      | (+) | (-) | (-) | (-) | (-) | (+) | (-) | (+)     |
| Kristensen, et al [24] | (+) | (-) | (-) | (-) | (-) | (x) | (-) | (x)     |
| Sundermann, et al [25] | (+) | (-) | (-) | (-) | (-) | (+) | (-) | (+)     |
| Satta, et al. [26]     | (x) | (+) | (-) | (-) | (-) | (+) | (-) | (x)     |
| Lindholt, et al. [27]  | (+) | (-) | (-) | (+) | (-) | (+) | (-) | (+)     |

|                                |     |     |     |     |     |     |     |     |
|--------------------------------|-----|-----|-----|-----|-----|-----|-----|-----|
| Colledge, et al. [28]          | (+) | (-) | (-) | (-) | (-) | (+) | (-) | (+) |
| Flondell-Site, et al. [29]     | (+) | (-) | (+) | (-) | (-) | (+) | (-) | (+) |
| Wiernicki, et al. [30]         | (+) | (-) | (+) | (-) | (-) | (+) | (-) | (+) |
| Martinez-Pinna, et al.<br>[31] | (+) | (-) | (-) | (+) | (-) | (-) | (-) | (+) |
| Martin-Ventura, et al.<br>[32] | (+) | (-) | (+) | (-) | (-) | (-) | (-) | (+) |
| Lindholt, et al. [33]          | (+) | (-) | (-) | (-) | (-) | (-) | (-) | (+) |
| Ramos-Mozo, et al.<br>[34]     | (+) | (+) | (+) | (-) | (-) | (-) | (-) | (+) |
| Ye, et al. [35]                | (+) | (-) | (-) | (-) | (-) | (-) | (-) | (+) |
| Wainhanen, et al. [36]         | (+) | (-) | (+) | (-) | (-) | (-) | (-) | (+) |
| Wang, et al. [37]              | (+) | (-) | (-) | (-) | (-) | (+) | (-) | (+) |
| Ahmad, et al. [38]             | (+) | (-) | (-) | (-) | (-) | (+) | (-) | (+) |
| Groeneveld, et al. [42]        | (x) | (+) | (-) | (-) | (-) | (+) | (-) | (x) |
| Lindholt, et al. [39]          | (+) | (-) | (-) | (-) | (-) | (+) | (-) | (+) |
| Memon, et al. [40]             | (+) | (-) | (-) | (-) | (-) | (+) | (-) | (+) |
| Eilenberg, et al. [41]         | (+) | (-) | (+) | (-) | (-) | (+) | (-) | (+) |

Abbreviations: D1-7: Domain 1-7, (-): Low risk of bias, (+): Moderate risk of bias, (x): Serious risk of bias.
